# Supplementary material for: Indolium 1 Exerts Activity against Vemurafenib-Resistant Melanoma In Vivo
Source: MDPI journal article supplement (doi:10.3390/antiox11050798), 2022-04-19
Supplement: s1 [file s1]

# Supplemental Figures:

RT :9.81-38.33

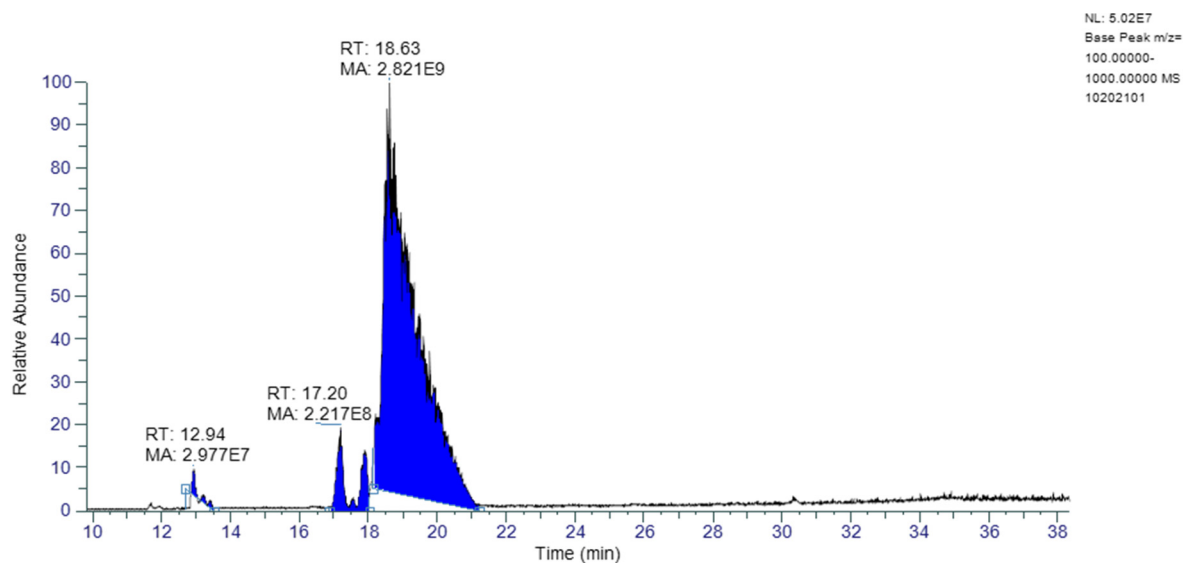

| RT (Min) | Peak Area | % Area | % Height | Integration Method |
|----------|-----------|--------|----------|--------------------|
| 12.94405 | 29767039  | 0.97   | 4.96     | Manual             |
| 17.20415 | 2.22E+08  | 7.22   | 16.09    | Manual             |
| 18.62597 | 2.82E+09  | 91.81  | 78.95    | Manual             |

## Supplemental Figure S1. Liquid Chromatography data for Indolium 1.

10202101 #845-859 RT: 12.85-13.04 AV: 15 SB: 32 12.69-13.14 NL: 1.50E6  
T: FTMS + p APCI corona Full ms [100.00-1000.00]

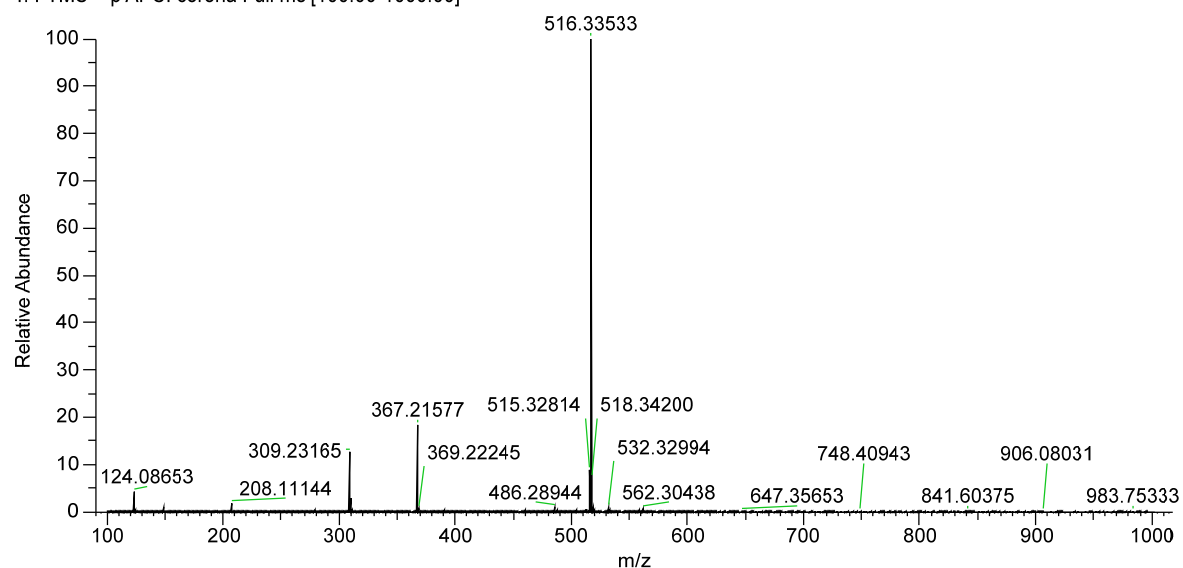

## Supplemental Figure S2. Mass Spectrometry data for Indolium 1.

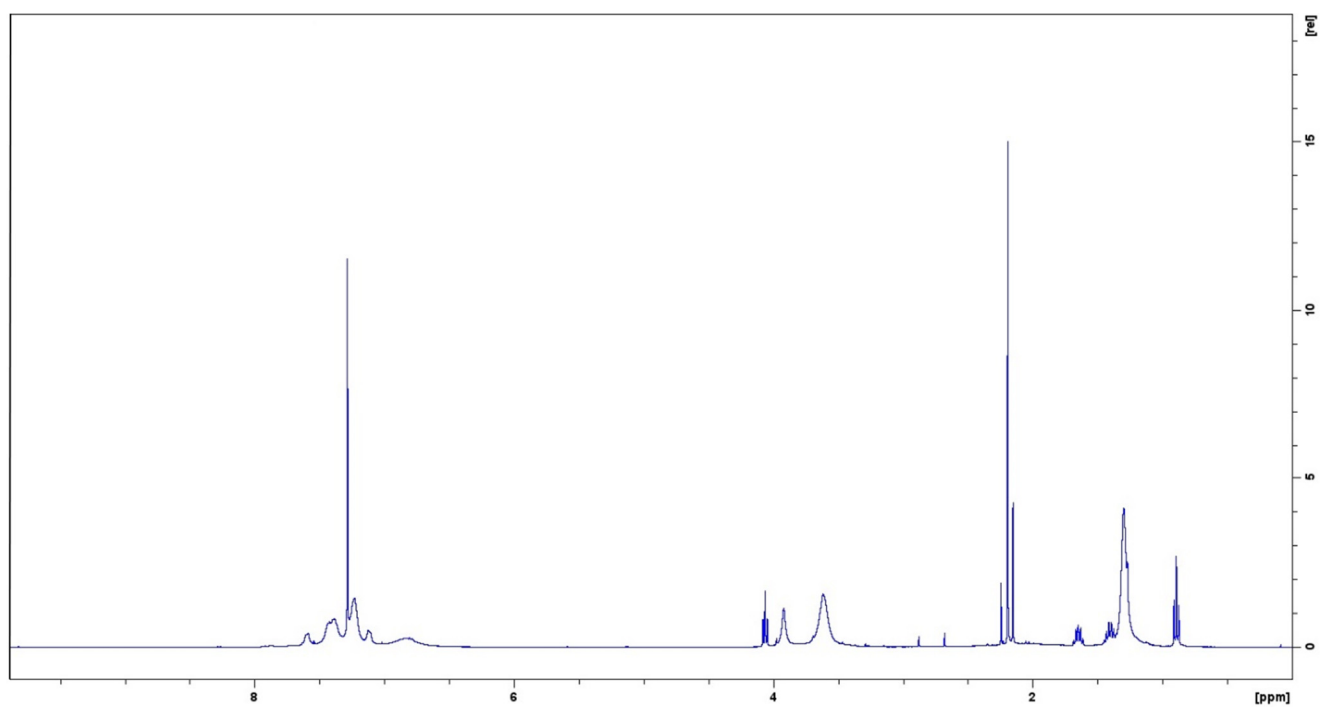

**Supplemental Figure S3.** HNMR Profile for Indolium 1.
